# Supplementary material for: H3N2 influenza A virus gradually adapts to human-type receptor binding and entry specificity after the start of the 1968 pandemic
Source: PubMed Central journal article supplement — Proc Natl Acad Sci U S A. 2023 Jul 19;120(31):e2304992120. doi: 10.1073/pnas.2304992120 (PMC10401031; doi:10.1073/pnas.2304992120), 2023-07-19
Supplement: pnas.2304992120.sapp.pdf [file pnas.2304992120.sapp.pdf]

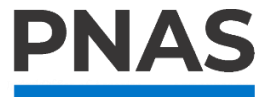

## **Supplementary Information for**

# **H3N2 influenza A virus gradually adapts to human-type receptor binding and entry specificity after the start of the 1968 pandemic**

Mengying Liu<sup>1</sup>, A. Sophie Bakker<sup>1</sup>, Yoshiki Narimatsu<sup>2</sup>, Frank J.M. van Kuppeveld<sup>1</sup>, Henrik Clausen<sup>2</sup>, Cornelis A.M. de Haan<sup>1\*</sup>, Erik de Vries<sup>1\*</sup>

Erik de Vries

Email: [e.devries@uu.nl](mailto:e.devries@uu.nl)

### **This PDF file includes:**

Figures S1 to S3

Tables S1 to S6

**Figure S1.**

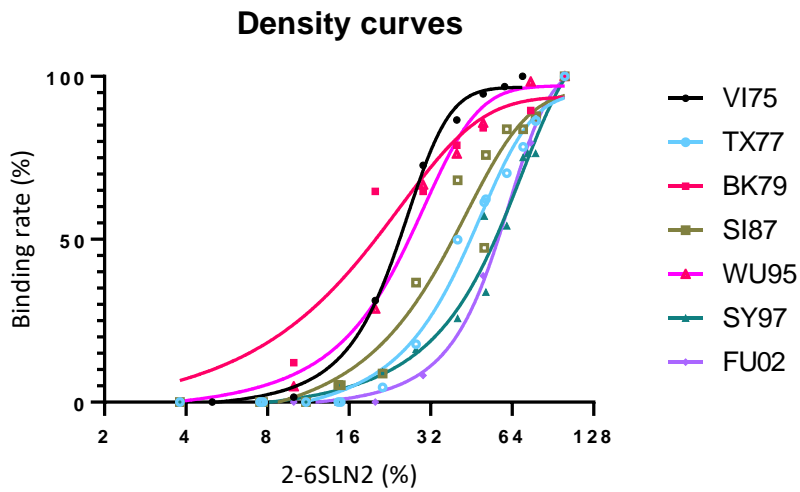

**Fig. S1.** Effect of receptor density on virus binding rate. Relative virus binding rate (normalized to maximum binding rate per virus) to BLI sensors loaded with different densities of 2-6Sia-(LN)2 was determined for the indicated H3N2 strains and plotted against receptor density. Receptor densities at which binding rate was half-maximal were determined and listed in table S4.

**Figure S2.**

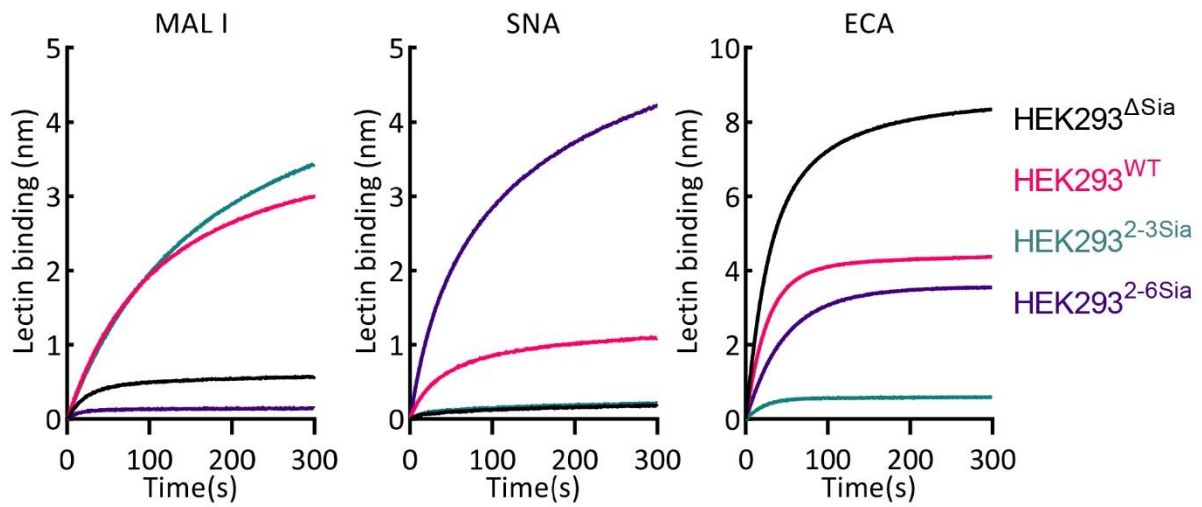

**Fig. S2.** Lectin binding analysis of LAMP1. Glycan-specific lectins MAL I (terminal Sia $\alpha$ 2-3Gal $\beta$ 1-4GlcNAc), SNA (terminal Sia $\alpha$ 2-6Gal $\beta$ 1-4GlcNAc) and ECA (terminal Gal $\beta$ 1-4GlcNAc) were associated for 300s to BLI sensors loaded to the same level with LAMP1 produced in the four indicated cell types. A previous study has demonstrated that HEK293<sup>2-6Sia</sup> and HEK293<sup>2-3Sia</sup> cells transfected with the amounts of ST6Gal1 or ST3Gal4 used here were sialylated to the maximally reachable level [1].

**Figure S3.**

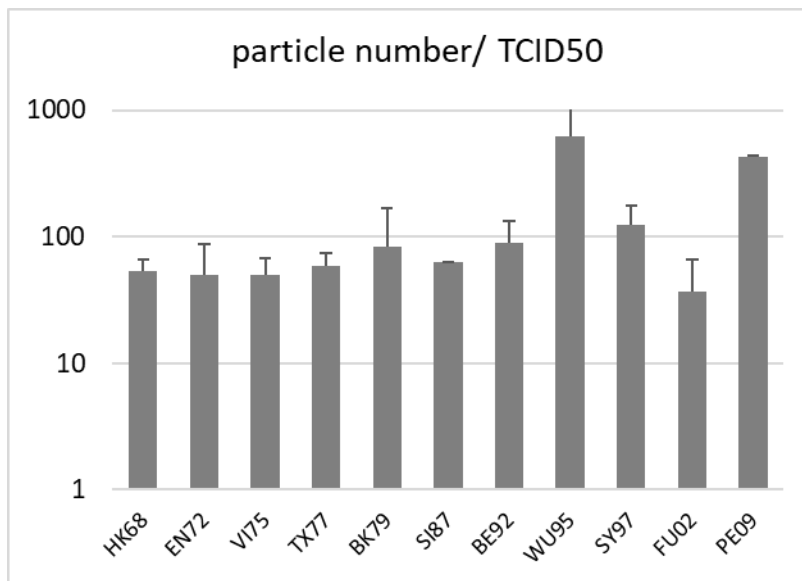

**Fig. S3.** Infectious titers over virus particle number. Infectious titers were determined by TCID<sub>50</sub> in duplicate on the 11 H3N2 strains and divided by particle numbers as determined by NTA nano-tracking. Error bars indicate SEM.

**Table S1.**

Association rate constant of human H3N2 strains

|             | $K_{on}$ ( $M^{-1}min^{-1}$ ) |                   |                   |                   |
|-------------|-------------------------------|-------------------|-------------------|-------------------|
|             | 6SLac                         | 6SLN              | 3SLac             | 3SLN              |
| HK68        | 18277 ± 7082 <sup>a</sup>     | 11597 ± 7834      | 9455 ± 5625       | 12315 ± 10596     |
| EN72        | 17145 ± 3559                  | 5418 ± 2339       | 9115 ± 3501       | 4322 ± 2067       |
| VI75        | 36301 ± 20452                 | 22904 ± 4978      | 30425 ± 10273     | 15460 ± 3609      |
| TX77        | 49757 ± 15401                 | 19604 ± 8116      | 14340 ± 4145      | 5801 ± 1669       |
| BK79        | 49194 ± 11047                 | 20552 ± 9911      | 9876 ± 1864       | 3798 ± 1015       |
| SI87        | 29577 ± 10170                 | 12206 ± 2983      | 4566 ± 2213       | 1444 ± 697        |
| BE92        | 14024 ± 4540                  | 13697 ± 5269      | 2137 ± 1001       | 1176 ± 597        |
| WU95        | 12116 ± 2356                  | 13461 ± 2376      | 6235 ± 1829       | 3743 ± 2177       |
| SI97        | 3778 ± 3148                   | 4888 ± 2773       | 1165 ± 496        | N.D. <sup>b</sup> |
| FU02        | 849 ± 216                     | 3182 ± 1536       | N.D. <sup>b</sup> | N.D. <sup>b</sup> |
| PE09        | 1613 ± 776                    | 1727 ± 1006       | N.D. <sup>b</sup> | N.D. <sup>b</sup> |
| H5N1 (HU02) | 6913 ± 2776                   | N.D. <sup>b</sup> | 49926 ± 10499     | 19464 ± 10287     |

<sup>a</sup>Standard deviation<sup>b</sup>Not determined6SLac (Sia $\alpha$ 2-6Gal $\beta$ 1-4Glc); 6SLN (Sia $\alpha$ 2-6Gal $\beta$ 1-4GlcNAc)3SLac (Sia $\alpha$ 2-3Gal $\beta$ 1-4Glc); 3SLN (Sia $\alpha$ 2-3Gal $\beta$ 1-4GlcNAc)

**Table S2.**

Dissociation rate constant of human H3N2 strains

|             | <b>K<sub>off</sub> (min<sup>-1</sup>)</b> |                   |                   |                   |
|-------------|-------------------------------------------|-------------------|-------------------|-------------------|
|             | 6SLac                                     | 6SLN              | 3SLac             | 3SLN              |
| HK68        | 76.0 ± 6.2 <sup>a</sup>                   | 66.8 ± 8.2        | 69.0 ± 6.9        | 80.1 ± 9.5        |
| EN72        | 55.8 ± 3.0                                | 53.4 ± 5.1        | 73.1 ± 4.5        | 55.7 ± 5.2        |
| VI75        | 54.0 ± 5.8                                | 58.2 ± 5.2        | 55.9 ± 7.9        | 57.5 ± 4.6        |
| TX77        | 63.9 ± 6.0                                | 58.9 ± 7.4        | 54.2 ± 4.2        | 53.8 ± 4.9        |
| BK79        | 44.6 ± 3.1                                | 43.2 ± 5.0        | 55.7 ± 4.2        | 47.5 ± 3.9        |
| SI87        | 47.8 ± 3.9                                | 45.5 ± 3.8        | 53.6 ± 4.4        | 45.4 ± 4.1        |
| BE92        | 51.5 ± 4.3                                | 49.9 ± 4.9        | 46.5 ± 4.5        | 59.3 ± 6.2        |
| WU95        | 55.5 ± 3.4                                | 48.0 ± 3.6        | 52.5 ± 3.7        | 52.0 ± 5.5        |
| SI97        | 62.4 ± 9.6                                | 69.3 ± 11.9       | 47.5 ± 7.8        | N.D. <sup>b</sup> |
| FU02        | 58.1 ± 2.6                                | 37.7 ± 7.0        | N.D. <sup>b</sup> | N.D. <sup>b</sup> |
| PE09        | 54.3 ± 9.1                                | 52.9 ± 6.7        | N.D. <sup>b</sup> | N.D. <sup>b</sup> |
| H5N1 (HU02) | 49.0 ± 4.9                                | N.D. <sup>b</sup> | 42.3 ± 2.4        | 39.9 ± 4.4        |

<sup>a</sup>Standard deviation<sup>b</sup>Not determined

6SLac (Siaα2-6Galβ1-4Glc); 6SLN (Siaα2-6Galβ1-4GlcNAc)

3SLac (Siaα2-3Galβ1-4Glc); 3SLN (Siaα2-3Galβ1-4GlcNAc)

**Table S3.**

$K_D$  values determined in this study compared with values reported in literature

| $K_D$ (mM)                 |                         |              |                               |                         |                             |                           |                               |                 |                  |
|----------------------------|-------------------------|--------------|-------------------------------|-------------------------|-----------------------------|---------------------------|-------------------------------|-----------------|------------------|
| Reference                  | Sauter [2]              | Hanson [3]   | Matrosovich [4]               | Takemoto [5]            | Xiong [6]                   | Fei [7]                   | Wang [8]                      | Ji [9]          | Liu              |
| Year of study              | 1989                    | 1992         | 1992                          | 1996                    | 2013                        | 2015                      | 2017                          | 2018            | this study       |
| Method                     | NMR                     | NMR          | Endpoint binding <sup>2</sup> | SPR competition         | MST                         | Ellipsometry assoc/dissoc | Endpoint binding <sup>2</sup> | BLI competition | BLI assoc/dissoc |
| In solution; Surface-bound | HA <sup>1</sup> /glycan | Virus/glycan | Virus/glycan                  | HA <sup>1</sup> /glycan | rechHA <sub>3</sub> /glycan | Virus/glycan              | Virus/glycan                  | Virus/glycan    | Virus/glycan     |
| Temperature                | 24°C                    | 24°C         | 4°C                           | unknown                 | 25°C                        | 15°C                      | 4°C                           | 20°C            | 30°C             |
| 3SLac                      | 3.2                     | 3.5          | 2.2                           | 2.4                     | 3.6                         |                           |                               |                 | 7.53             |
| 6SLac                      | 2.1                     | 2.7          | 2.6                           | 1.2                     | 1.7                         |                           |                               |                 | 4.16             |
| 3SLN                       |                         |              |                               |                         | 3.13                        |                           |                               | 2.7             | 6.5              |
| 6SLN                       |                         |              |                               |                         | 2.03                        |                           |                               | 2.4             | 5.76             |
| 3SLN/6SLN                  |                         |              |                               |                         | 1.54                        |                           |                               | 1.13            | 1.13             |
| 3SLac/6SLac                | 1.52                    | 1.3          | 0.85                          | 2                       | 2.12                        |                           |                               |                 | 1.81             |
| 3SLac                      |                         |              |                               |                         |                             | 2.6                       | 26.3                          |                 | 8.02             |
| 6SLac                      |                         |              |                               |                         |                             | 6.8                       | 47.6                          |                 | 3.25             |
| 3SLN                       |                         |              |                               |                         |                             |                           |                               |                 | 12.89            |
| 6SLN                       |                         |              |                               |                         |                             |                           |                               |                 | 9.86             |
| Select. Ratio              |                         |              |                               |                         |                             | 0.38                      | 0.55                          |                 | 2.47             |
| 3SLac                      |                         |              |                               |                         |                             |                           |                               |                 | 21.74            |
| 6SLac                      |                         |              |                               |                         |                             |                           | 1.1                           |                 | 3.67             |
| 3SLN                       |                         |              |                               |                         |                             |                           |                               |                 | 50.42            |
| 6SLN                       |                         |              |                               |                         |                             |                           | 1.2                           |                 | 3.64             |
| 3SLac                      |                         |              |                               |                         | 0.7                         |                           |                               |                 | 0.85             |
| 6SLac                      |                         |              |                               |                         | 21                          |                           |                               |                 | 7.09             |
| 3SLN                       |                         |              |                               |                         | 1.1                         |                           |                               |                 | 2.05             |
| 6SLN                       |                         |              |                               |                         | 17                          |                           |                               |                 | 30 <sup>3</sup>  |
| 3SLN/6SLN                  |                         |              |                               |                         | 0.06                        |                           |                               |                 | 0.07             |
| 3SLac/6SLac                |                         |              |                               |                         | 0.03                        |                           |                               |                 | 0.12             |

<sup>1</sup>Bromelain-released HA rosettes

<sup>2</sup>Virus coated multi-well plates

<sup>3</sup>For low affinities  $K_D$  was estimated by taking half of the projected maximum equilibrium binding level;  $K_{on}$  and  $k_{off}$  could not be reliably determined from the curves  
 A168 (A/Aichi/2/1968(H3N2)); ME71 (A/Memphis/1/1971(H3N2)); VN04 (A/Vietnam/1194/2004(H5N1))

**Table S4**

Relation of  $K_D$  to receptor density effects on virus binding under multivalent or heteromultivalent binding conditions

|      | $K_D$<br>6SLN | $K_D$<br>3SLN   | 2-6Sia-(LN)2<br>density at 50%<br>binding rate | 2-6Sia-(LN)2<br>density at 50%<br>binding rate | $K_D$ 3SLN/ $K_D$<br>6SLN | 50% binding rate<br>Multivalent/Heteromultivalent |
|------|---------------|-----------------|------------------------------------------------|------------------------------------------------|---------------------------|---------------------------------------------------|
|      |               |                 | Multivalent <sup>a</sup>                       | Heteromultivalent <sup>b</sup>                 |                           |                                                   |
| VI75 | 2.54          | 3.72            | 24.5                                           | 17.6                                           | 1.5                       | 1.4                                               |
| TX77 | 3.01          | 9.27            | 45.1                                           |                                                |                           |                                                   |
| BK79 | 2.10          | 12.50           | 20.2                                           | 10.2                                           | 5.9                       | 2.0                                               |
| SI87 | 3.73          | 31.47           | 38.4                                           |                                                |                           |                                                   |
| WU95 | 3.57          | 13.88           | 26.9                                           | 13.0                                           | 3.9                       | 2.1                                               |
| SY97 | 14.17         | 50 <sup>c</sup> | 55.2                                           |                                                |                           |                                                   |
| FU02 | 11.85         | 50 <sup>c</sup> | 56.2                                           | 33.4                                           | 4.2                       | 1.7                                               |

<sup>a</sup>A density range of 2-6Sia-(LN)2 was complemented by (LN)2 (see Fig. S1)

<sup>b</sup>A density range of 2-6Sia-(LN)2 was complemented by 2-3Sia-(LN)2; values taken from [1]

<sup>c</sup>Approximate  $K_D$ s that could only be estimated from equilibrium binding levels



**Table S5.**

Statistical analysis of curves fitted to the equation  $y=ax^b$  (Fig. 3b-e).

|                                |      |        | a      |          |          |           |           | b    |          |          |           |           |
|--------------------------------|------|--------|--------|----------|----------|-----------|-----------|------|----------|----------|-----------|-----------|
| R <sup>2</sup>                 |      |        | a      | SE       | p        | lower 95% | upper 95% | b    | SE       | p        | lower 95% | upper 95% |
| HEK293 <sup>WT</sup> cells     | HK68 | 1.00   | 1.58   | 0.04     | 6.31E-06 | 1.49      | 1.67      | 1.04 | 0.01     | 6.45E-09 | 1.01      | 1.07      |
|                                | EN72 | 0.99   | 2.99   | 0.33     | 4.97E-04 | 2.22      | 4.01      | 0.77 | 0.05     | 9.33E-05 | 0.63      | 0.90      |
|                                | VI75 | 0.98   | 10.04  | 0.34     | 2.71E-07 | 9.14      | 11.02     | 0.59 | 0.02     | 1.64E-05 | 0.53      | 0.66      |
|                                | TX77 | 1.00   | 1.17   | 0.06     | 3.94E-02 | 1.01      | 1.35      | 0.88 | 0.03     | 7.01E-06 | 0.80      | 0.96      |
|                                | BK79 | 0.96   | 1.27   | 0.18     | 1.47E-01 | 0.88      | 1.82      | 0.95 | 0.06     | 8.94E-05 | 0.79      | 1.12      |
|                                | SI87 | 1.00   | 0.34   | 0.02     | 9.86E-05 | 0.28      | 0.41      | 0.93 | 0.02     | 2.54E-06 | 0.86      | 0.99      |
|                                | BE92 | 0.99   | 1.37   | 0.11     | 1.02E-02 | 1.12      | 1.68      | 1.05 | 0.05     | 3.91E-06 | 0.93      | 1.18      |
|                                | WU95 | 1.00   | 0.57   | 0.06     | 6.07E-03 | 0.42      | 0.76      | 1.04 | 0.06     | 5.05E-05 | 0.89      | 1.20      |
|                                | SY97 | 0.99   | 0.39   | 0.05     | 5.15E-04 | 0.29      | 0.53      | 1.07 | 0.05     | 3.96E-06 | 0.95      | 1.20      |
|                                | FU02 | 0.97   | 2.96   | 0.28     | 2.79E-04 | 2.30      | 3.81      | 1.03 | 0.07     | 1.06E-04 | 0.85      | 1.22      |
| PE09                           | 0.99 | 2.07   | 0.10   | 2.18E-05 | 1.83     | 2.34      | 0.97      | 0.03 | 2.64E-07 | 0.90     | 1.03      |           |
| HEK293 <sup>ΔSia</sup> cells   | HK68 | 1.00   | 0.0066 | 0.0009   | 2.24E-06 | 0.00      | 0.01      | 1.06 | 0.05     | 3.31E-05 | 0.92      | 1.20      |
|                                | EN72 | 0.92   | 0.0029 | 0.0005   | 3.27E-07 | 0.00      | 0.00      | 0.94 | 0.08     | 8.30E-05 | 0.73      | 1.14      |
|                                | VI75 | 0.99   | 0.0049 | 0.0006   | 9.42E-08 | 0.00      | 0.01      | 0.88 | 0.07     | 4.27E-05 | 0.71      | 1.06      |
|                                | TX77 | 0.97   | 0.0011 | 0.0003   | 1.33E-05 | 0.00      | 0.00      | 1.12 | 0.09     | 2.25E-04 | 0.87      | 1.37      |
|                                | BK79 | 0.99   | 0.0019 | 0.0008   | 3.28E-04 | 0.00      | 0.01      | 1.07 | 0.14     | 4.42E-03 | 0.63      | 1.51      |
|                                | SI87 | 0.99   | 0.0005 | 0.0002   | 2.60E-04 | 0.00      | 0.00      | 1.07 | 0.15     | 5.53E-03 | 0.60      | 1.55      |
|                                | BE92 | 0.96   | 0.0012 | 0.0004   | 5.83E-07 | 0.00      | 0.00      | 1.08 | 0.15     | 4.12E-04 | 0.71      | 1.46      |
|                                | WU95 | 0.99   | 0.0008 | 0.0002   | 9.02E-06 | 0.00      | 0.00      | 1.17 | 0.10     | 3.19E-04 | 0.89      | 1.45      |
|                                | SY97 | 0.99   | 0.0086 | 0.0020   | 2.74E-06 | 0.01      | 0.01      | 1.10 | 0.09     | 5.37E-05 | 0.87      | 1.32      |
|                                | FU02 | 0.99   | 0.0383 | 0.0037   | 3.79E-06 | 0.03      | 0.05      | 0.94 | 0.04     | 1.78E-05 | 0.84      | 1.05      |
| PE09                           | 0.93 | 0.1216 | 0.0269 | 1.32E-04 | 0.07     | 0.20      | 0.91      | 0.08 | 1.19E-04 | 0.70     | 1.13      |           |
| HEK293 <sup>2-3Sia</sup> cells | HK68 | 1.00   | 3.0880 | 0.2779   | 4.65E-05 | 2.47      | 3.85      | 0.71 | 0.04     | 8.98E-06 | 0.61      | 0.80      |
|                                | EN72 | 0.99   | 4.8175 | 0.3651   | 2.76E-05 | 3.93      | 5.90      | 0.64 | 0.06     | 3.85E-04 | 0.48      | 0.80      |
|                                | VI75 | 0.98   | 1.0715 | 0.0688   | 3.18E-01 | 0.91      | 1.26      | 0.71 | 0.03     | 1.68E-06 | 0.64      | 0.78      |
|                                | TX77 | 1.00   | 0.4420 | 0.0595   | 2.95E-03 | 0.31      | 0.63      | 0.89 | 0.09     | 6.79E-04 | 0.63      | 1.14      |
|                                | BK79 | 0.96   | 0.0259 | 0.0029   | 4.00E-07 | 0.02      | 0.03      | 1.22 | 0.05     | 2.59E-06 | 1.09      | 1.35      |
|                                | SI87 | 1.00   | 0.0009 | 0.0002   | 2.05E-07 | 0.00      | 0.00      | 1.19 | 0.08     | 3.19E-05 | 0.97      | 1.41      |
|                                | BE92 | 0.99   | 0.0014 | 0.0006   | 9.44E-06 | 0.00      | 0.00      | 1.37 | 0.17     | 5.28E-04 | 0.93      | 1.82      |
|                                | WU95 | 1.00   | 0.0047 | 0.0017   | 1.22E-05 | 0.00      | 0.01      | 1.23 | 0.14     | 2.73E-04 | 0.88      | 1.58      |
|                                | SY97 | 0.99   | 0.0332 | 0.0028   | 2.97E-05 | 0.03      | 0.04      | 1.09 | 0.05     | 2.30E-04 | 0.93      | 1.25      |
|                                | FU02 | 0.97   | 0.7719 | 0.1021   | 9.17E-02 | 0.56      | 1.06      | 0.88 | 0.06     | 2.08E-05 | 0.73      | 1.03      |
| PE09                           | 0.99 | 1.8800 | 0.1900 | 1.24E-03 | 1.47     | 2.41      | 0.91      | 0.04 | 3.50E-06 | 0.80     | 1.01      |           |
| HEK293 <sup>2-6Sia</sup> cells | HK68 | 1.00   | 2.09   | 0.06     | 1.32E-04 | 1.91      | 2.30      | 0.68 | 0.03     | 1.45E-04 | 0.60      | 0.77      |
|                                | EN72 | 0.99   | 6.73   | 1.02     | 1.73E-04 | 4.55      | 9.96      | 0.69 | 0.11     | 3.35E-03 | 0.39      | 1.00      |
|                                | VI75 | 0.98   | 1.72   | 0.15     | 1.15E-03 | 1.40      | 2.13      | 0.66 | 0.05     | 3.08E-05 | 0.54      | 0.78      |
|                                | TX77 | 1.00   | 3.76   | 0.35     | 1.19E-04 | 2.93      | 4.81      | 0.65 | 0.07     | 5.70E-04 | 0.47      | 0.83      |
|                                | BK79 | 0.96   | 11.79  | 0.71     | 1.39E-07 | 10.15     | 13.70     | 0.50 | 0.04     | 3.49E-05 | 0.41      | 0.59      |
|                                | SI87 | 1.00   | 3.79   | 0.39     | 3.91E-05 | 2.95      | 4.88      | 0.76 | 0.06     | 5.07E-05 | 0.61      | 0.91      |
|                                | BE92 | 0.99   | 8.04   | 0.77     | 3.12E-06 | 6.35      | 10.18     | 0.62 | 0.06     | 1.12E-04 | 0.47      | 0.76      |
|                                | WU95 | 1.00   | 2.45   | 0.31     | 1.78E-03 | 1.75      | 3.42      | 0.71 | 0.08     | 1.11E-03 | 0.48      | 0.95      |
|                                | SY97 | 0.99   | 0.27   | 0.02     | 2.49E-05 | 0.23      | 0.32      | 1.08 | 0.04     | 1.13E-05 | 0.97      | 1.19      |
|                                | FU02 | 0.97   | 3.76   | 0.30     | 6.99E-05 | 3.03      | 4.66      | 0.42 | 0.04     | 6.68E-04 | 0.30      | 0.54      |
| PE09                           | 0.99 | 3.75   | 0.31   | 1.39E-05 | 3.06     | 4.59      | 1.03      | 0.04 | 2.29E-06 | 0.92     | 1.14      |           |

**Table S6.**

Statistical analysis of curves fitted to the equation  $y=ax^b$  (Fig. 4a shows example for BK79).

|      |   | HEK293 <sup>2-6Sia</sup> cells |      |      |         |      |      |         | HEK293 <sup>2-3Sia</sup> cells |        |        |         |      |      |         |
|------|---|--------------------------------|------|------|---------|------|------|---------|--------------------------------|--------|--------|---------|------|------|---------|
|      |   | R <sup>2</sup>                 | a    |      |         | b    |      |         | R <sup>2</sup>                 | a      |        |         | b    |      |         |
|      |   |                                | a    | SE   | p       | b    | SE   | p       |                                | a      | SE     | p       | b    | SE   | p       |
| HK68 | 1 | 0.99                           | 0.31 | 0.02 | 4.9E-04 | 0.93 | 0.07 | 8.5E-04 | 0.99                           | 1.0669 | 0.0786 | 4.3E-01 | 0.93 | 0.07 | 8.5E-04 |
|      | 2 | 1.00                           | 0.45 | 0.02 | 2.1E-04 | 0.75 | 0.03 | 2.2E-04 | 1.00                           | 1.4824 | 0.0400 | 6.7E-04 | 0.78 | 0.03 | 7.5E-05 |
|      | 3 | 0.99                           | 1.22 | 0.03 | 4.7E-03 | 0.60 | 0.02 | 1.6E-04 | 1.00                           | 0.3021 | 0.0409 | 2.5E-03 | 0.85 | 0.12 | 6.1E-03 |
| EN72 | 1 | 0.89                           | 1.24 | 0.22 | 3.3E-01 | 0.65 | 0.18 | 7.1E-02 | 0.98                           | 1.7102 | 0.0787 | 6.9E-03 | 0.50 | 0.05 | 9.7E-03 |
|      | 2 | 1.00                           | 2.87 | 0.06 | 3.8E-04 | 0.79 | 0.02 | 8.4E-04 | 1.00                           | 1.7423 | 0.0549 | 3.1E-03 | 0.73 | 0.03 | 2.2E-03 |
|      | 3 | 0.98                           | 4.15 | 0.14 | 5.1E-04 | 0.42 | 0.04 | 7.3E-03 | 0.85                           | 1.7439 | 0.2458 | 5.2E-02 | 0.62 | 0.15 | 5.1E-02 |
| VI75 | 1 | 0.98                           | 0.24 | 0.02 | 5.7E-04 | 0.87 | 0.09 | 2.2E-03 | 1.00                           | 0.3378 | 0.0105 | 4.9E-05 | 0.81 | 0.03 | 1.0E-04 |
|      | 2 | 1.00                           | 0.90 | 0.03 | 4.8E-02 | 0.77 | 0.03 | 1.4E-04 | 0.99                           | 0.3377 | 0.0135 | 1.0E-04 | 0.84 | 0.04 | 1.9E-04 |
| TX77 | 1 | 1.00                           | 1.19 | 0.04 | 3.1E-02 | 0.92 | 0.04 | 2.2E-03 | 0.95                           | 0.1896 | 0.0231 | 4.5E-03 | 0.92 | 0.14 | 1.6E-02 |
|      | 2 | 0.98                           | 1.33 | 0.09 | 4.4E-02 | 0.83 | 0.08 | 9.3E-03 | 0.82                           | 0.1035 | 0.0097 | 1.4E-03 | 0.91 | 0.11 | 8.4E-03 |
|      | 3 | 1.00                           | 1.38 | 0.03 | 4.8E-03 | 0.96 | 0.03 | 1.2E-03 | 0.99                           | 0.1471 | 0.0324 | 1.0E-02 | 0.96 | 0.25 | 5.0E-02 |
| BK79 | 1 | 0.80                           | 4.03 | 0.64 | 2.6E-03 | 0.52 | 0.12 | 2.1E-02 | 0.92                           | 0.0074 | 0.0021 | 2.9E-04 | 0.90 | 0.20 | 1.9E-02 |
|      | 2 | 1.00                           | 5.06 | 0.12 | 6.6E-06 | 0.51 | 0.02 | 1.0E-04 | 1.00                           | 0.0123 | 0.0018 | 6.4E-05 | 1.24 | 0.11 | 1.3E-03 |
|      | 3 | 0.99                           | 2.45 | 0.15 | 6.8E-04 | 0.70 | 0.05 | 6.7E-04 | 0.98                           | 0.0067 | 0.0009 | 3.4E-05 | 1.11 | 0.10 | 1.4E-03 |
| SI87 | 1 | 0.98                           | 1.02 | 0.07 | 7.7E-01 | 0.74 | 0.05 | 5.3E-04 | 0.98                           | 0.0003 | 0.0001 | 2.0E-05 | 1.29 | 0.13 | 2.1E-03 |
|      | 2 | 0.99                           | 0.78 | 0.03 | 6.2E-03 | 0.87 | 0.03 | 6.3E-05 | 0.99                           | 0.0003 | 0.0001 | 1.6E-05 | 1.46 | 0.12 | 1.1E-03 |
|      | 3 | 0.90                           | 2.51 | 0.28 | 3.4E-03 | 0.69 | 0.08 | 3.3E-03 | 0.99                           | 0.0002 | 0.0001 | 9.2E-05 | 1.50 | 0.22 | 6.5E-03 |
| BE92 | 1 | 0.99                           | 3.10 | 0.08 | 2.4E-05 | 0.73 | 0.03 | 9.3E-05 | 0.87                           | 0.0004 | 0.0001 | 9.1E-05 | 1.06 | 0.28 | 3.1E-02 |
|      | 2 | 0.99                           | 2.48 | 0.08 | 8.2E-05 | 0.89 | 0.03 | 8.8E-05 | 0.81                           | 0.0007 | 0.0004 | 6.1E-04 | 1.07 | 0.48 | 1.1E-01 |
|      | 3 | 0.99                           | 2.29 | 0.16 | 1.2E-03 | 0.87 | 0.07 | 1.1E-03 | 0.89                           | 0.0004 | 0.0002 | 1.6E-04 | 1.18 | 0.33 | 3.6E-02 |
| WU95 | 1 | 0.97                           | 0.19 | 0.04 | 2.9E-03 | 1.03 | 0.12 | 3.7E-03 | 0.96                           | 0.0016 | 0.0008 | 4.5E-04 | 1.59 | 0.25 | 8.0E-03 |
|      | 2 | 0.89                           | 0.20 | 0.02 | 6.7E-04 | 0.58 | 0.07 | 4.0E-03 | 0.99                           | 0.0026 | 0.0005 | 1.1E-03 | 1.22 | 0.48 | 4.7E-02 |
|      | 3 | 0.97                           | 0.90 | 0.14 | 4.9E-01 | 0.80 | 0.09 | 3.5E-03 | 0.94                           | 0.0008 | 0.0006 | 1.1E-03 | 1.09 | 0.14 | 1.3E-06 |
|      | 4 | 0.85                           | 2.30 | 0.48 | 2.2E-02 | 0.54 | 0.13 | 2.4E-02 | 0.91                           | 0.0005 | 0.0006 | 1.9E-03 | 1.56 | 0.14 | 1.3E-06 |
| SY97 | 1 | 0.93                           | 0.02 | 0.00 | 1.3E-06 | 0.94 | 0.09 | 7.6E-05 | 0.98                           | 0.0125 | 0.0072 | 2.3E-04 | 0.98 | 0.29 | 2.1E-03 |
|      | 2 | 0.99                           | 0.11 | 0.01 | 4.4E-06 | 0.97 | 0.06 | 1.4E-05 | 0.99                           | 0.0100 | 0.0036 | 6.7E-05 | 1.20 | 0.25 | 1.9E-03 |
|      | 3 | 0.99                           | 0.13 | 0.02 | 4.0E-05 | 0.99 | 0.09 | 1.1E-04 | 0.97                           | 0.0103 | 0.0041 | 8.0E-05 | 1.08 | 0.25 | 2.5E-03 |
| FU02 | 1 | 1.00                           | 1.25 | 0.03 | 2.6E-03 | 0.58 | 0.02 | 1.5E-04 | 1.00                           | 0.3411 | 0.0318 | 1.2E-03 | 0.95 | 0.09 | 1.7E-03 |
|      | 2 | 0.96                           | 1.45 | 0.10 | 1.1E-02 | 0.65 | 0.06 | 2.1E-03 | 1.00                           | 0.2530 | 0.0125 | 9.5E-05 | 1.01 | 0.05 | 2.3E-04 |
|      | 3 | 1.00                           | 0.69 | 0.01 | 1.2E-04 | 0.52 | 0.01 | 4.1E-05 | 1.00                           | 0.1386 | 0.0049 | 1.2E-05 | 1.22 | 0.03 | 4.6E-05 |
| PE09 | 1 | 0.99                           | 0.90 | 0.08 | 2.8E-01 | 1.08 | 0.07 | 1.3E-04 | 0.98                           | 0.3776 | 0.0234 | 5.1E-04 | 1.09 | 0.06 | 3.7E-04 |
|      | 2 | 1.00                           | 1.89 | 0.12 | 5.5E-04 | 1.07 | 0.05 | 3.4E-05 | 1.00                           | 0.7365 | 0.0459 | 1.5E-02 | 1.01 | 0.06 | 4.8E-04 |
|      | 3 | 0.99                           | 1.14 | 0.07 | 9.2E-02 | 1.03 | 0.05 | 3.4E-05 | 1.00                           | 0.5583 | 0.0146 | 1.9E-04 | 1.00 | 0.03 | 3.8E-05 |

## References

1. M. Liu, et al., Human-type sialic acid receptors contribute to avian influenza A virus binding and entry by hetero-multivalent interactions. *Nat Commun* 13, 4054 (2022).
2. N. K. Sauter, et al., Hemagglutinins from two influenza virus variants bind to sialic acid derivatives with millimolar dissociation constants: a 500-MHz proton nuclear magnetic resonance study. *Biochemistry* 28, 8388–8396 (1989).
3. J. E. Hanson, N. K. Sauter, J. J. Skehel, D. C. Wiley, Proton nuclear magnetic resonance studies of the binding of sialosides to intact influenza virus. *Virology* 189, 525–533 (1992).
4. A. S. Gambaryan, M. N. Matrosovich, A solid-phase enzyme-linked assay for influenza virus receptor-binding activity. *J Virol Methods* 39, 111–123 (1992).
5. D. K. Takemoto, J. J. Skehel, D. C. Wiley, A surface plasmon resonance assay for the binding of influenza virus hemagglutinin to its sialic acid receptor. *Virology* 217, 452–458 (1996).
6. S. G. Vachieri, et al., Receptor binding by H10 influenza viruses. *Nature* 511, 475–477 (2014).
7. Y. Fei, et al., Characterization of Receptor Binding Profiles of Influenza A Viruses Using An Ellipsometry-Based Label-Free Glycan Microarray Assay Platform. *Biomolecules* 5, 1480–1498 (2015).
8. X. Wang, et al., Amino Acids in Hemagglutinin Antigenic Site B Determine Antigenic and Receptor Binding Differences between A(H3N2)v and Ancestral Seasonal H3N2 Influenza Viruses. *J Virol* 91, e01512-16 (2017).
9. Y. Ji, R. J. Woods, Quantifying Weak Glycan-Protein Interactions Using a Biolayer Interferometry Competition Assay: Applications to ECL Lectin and X-31 Influenza Hemagglutinin. *Adv Exp Med Biol* 1104, 259–273 (2018).
